# Supplementary material
Source: HighWire-hosted journal article supplement (doi:10.1101/rna.079134.122)
Supplement: Supplemental_Legends.docx [file Supplemental_Legends.docx]

***Supplemental material***

The supplement includes the following figures and tables:

- **Figure S1 Coverage of obtained reads**: histogram depicting the different proportions of reads from RNA sequencing used to identify our lncRNA candidates.
- **Figure S2 RT-qPCR analysis of the lnc1 and lnc15 knock-downs**: Histograms with plotted relative expression levels of lncRNAs knocked-down in our study.
- **Figure S3 lnc15 is involved in maintaining the cell’s morphology**: Microscopy pictures of cells showcasing the morphological phenotype of lnc15-KD.
- **Figure S4 Size distribution of Paramecium MAC genome scaffolds**: Graph depicting the size distribution of *Paramecium* macronuclear genome scaffolds by length.
- **Table S1 General information on the predicted lncRNAs**: List of all identified lncRNAs, which includes information such as size.
- **Table S2 Primers used in this study**: List of oligonucleotide sequences used for our study.
